# Supplementary material for: CD276 as a Candidate Target for Immunotherapy in Medullary Thyroid Cancer
Source: MDPI journal article supplement (doi:10.3390/ijms241210019), 2023-06-12
Supplement: s1 [file s1]

**Supplementary Table S1. Clinical characteristics of patients according to staining intensity and percentage of immunoreactive cells with CD276 expression.**

|                                           | IHC-CD276 (1+ or 2+)<br>(11–50% cells) | IHC-CD276 (2+ or 3+)<br>(51–100% cells) | Total             | <i>p</i> -value |
|-------------------------------------------|----------------------------------------|-----------------------------------------|-------------------|-----------------|
|                                           | <i>n</i> =20                           | <i>n</i> =26                            | <i>n</i> =46      |                 |
| Gender, <i>n</i> (%)                      |                                        |                                         |                   | 0.0255          |
| Female                                    | 17 (85.0%)                             | 14 (53.8%)                              | 31 (67.4%)        |                 |
| Male                                      | 3 (15.0%)                              | 12 (46.2%)                              | 15 (32.6%)        |                 |
| Median age at diagnosis,<br>years (Q1,Q3) | 50.5 (40.5, 65.5)                      | 54.5 (44.5, 60.8)                       | 52.0 (41.0, 61.8) | 0.9117          |
| Median tumor size, mm<br>(Q1,Q3)          | 12.5 (6.0, 20.0)                       | 14.0 (8.2, 24.5)                        | 14.0 (7.0, 23.0)  | 0.5789          |
| Multifocality, <i>n</i> (%)               |                                        |                                         |                   | 0.9552          |
| No                                        | 14 (70.0%)                             | 18 (69.2%)                              | 32 (69.6%)        |                 |
| Yes                                       | 6 (30.0%)                              | 8 (30.8%)                               | 14 (30.4%)        |                 |
| Extrathyroidal extension, <i>n</i><br>(%) |                                        |                                         |                   | 0.5718          |
| No                                        | 18 (90.0%)                             | 25 (96.2%)                              | 43 (93.5%)        |                 |
| Yes                                       | 2 (10.0%)                              | 1 (3.8%)                                | 3 (6.5%)          |                 |
| Angioinvasion, <i>n</i> (%)               |                                        |                                         |                   | 1               |
| No                                        | 18 (90.0%)                             | 23 (88.5%)                              | 41 (89.1%)        |                 |
| Yes                                       | 2 (10.0%)                              | 3 (11.5%)                               | 5 (10.9%)         |                 |
| Tumor stage, <i>n</i> (%)                 |                                        |                                         |                   | 0.7878          |
| T1a                                       | 6 (30.0%)                              | 6 (23.1%)                               | 12 (26.1%)        |                 |
| T1am                                      | 4 (20.0%)                              | 4 (15.4%)                               | 8 (17.4%)         |                 |
| T1b                                       | 4 (20.0%)                              | 5 (19.2%)                               | 9 (19.6%)         |                 |
| T1bm                                      | 1 (5.0%)                               | 2 (7.7%)                                | 3 (6.5%)          |                 |
| T2                                        | 3 (15.0%)                              | 3 (11.5%)                               | 6 (13.0%)         |                 |
| T2m                                       | 1 (5.0%)                               | 3 (11.5%)                               | 4 (8.7%)          |                 |
| T3                                        | 0 (0.0%)                               | 3 (11.5%)                               | 3 (6.5%)          |                 |
| T3m                                       | 1 (5.0%)                               | 0 (0.0%)                                | 1 (2.2%)          |                 |

|                                                                        |                                   |                                   |                                  |        |
|------------------------------------------------------------------------|-----------------------------------|-----------------------------------|----------------------------------|--------|
| Node stage, <i>n</i> (%)                                               |                                   |                                   |                                  | 0.0021 |
| N0                                                                     | 15 (75.0%)                        | 12 (46.2%)                        | 27 (58.7%)                       |        |
| N1a                                                                    | 4 (20.0%)                         | 1 (3.8%)                          | 5 (10.9%)                        |        |
| N1b                                                                    | 1 (5.0%)                          | 13 (50.0%)                        | 14 (30.4%)                       |        |
| Lateral lymph node metastasis, <i>n</i> (%)                            |                                   |                                   |                                  | 0.0010 |
| No                                                                     | 19 (95.0%)                        | 13 (50.0%)                        | 32 (69.6%)                       |        |
| Yes                                                                    | 1 (5.0%)                          | 13 (50.0%)                        | 14 (30.4%)                       |        |
| Central lymph node metastasis, <i>n</i> (%)                            |                                   |                                   |                                  | 0.1512 |
| No                                                                     | 16 (80.0%)                        | 25 (96.2%)                        | 41 (89.1%)                       |        |
| Yes                                                                    | 4 (20.0%)                         | 1 (3.8%)                          | 5 (10.9%)                        |        |
| Distant metastasis, <i>n</i> (%)                                       |                                   |                                   |                                  | 0.4291 |
| M0                                                                     | 20 (100.0%)                       | 24 (92.3%)                        | 44 (95.6%)                       |        |
| M1                                                                     | 0 (0.0%)                          | 2 (7.7%)                          | 2 (4.4%)                         |        |
| Median preoperative serum calcitonin (CT) levels, pg/ml (Q1–Q3; range) | 480.0 (87.0–1592.0; 12.4–11735.0) | 400.0 (127.0–1200.0; 7.0–10968.0) | 434.0 (92.5–1218.5; 7.0–11735.0) | 0.7418 |
| <i>N</i> -Miss                                                         | 3                                 | 1                                 | 4                                |        |
| Postoperative serum calcitonin (CT) levels, <i>n</i> (%)               |                                   |                                   |                                  | 0.0036 |
| <2                                                                     | 14 (70.0%)                        | 7 (26.9%)                         | 21 (45.7%)                       |        |
| ≥2                                                                     | 6 (30.0%)                         | 19 (73.1%)                        | 25 (54.3%)                       |        |
| (Stimulated) Postoperative serum calcitonin (CT) levels, <i>n</i> (%)  |                                   |                                   |                                  | 0.0036 |
| <i>N</i> -Miss                                                         | 0                                 | 7                                 | 7                                |        |
| <2                                                                     | 14 (70.0%)                        | 7 (26.9%)                         | 21 (45.7%)                       |        |
| ≥2                                                                     | 6 (30.0%)                         | 19 (73.1%)                        | 25 (54.3%)                       |        |

|                                       |            |            |            |         |
|---------------------------------------|------------|------------|------------|---------|
| Initial response to therapy, <i>n</i> |            |            |            | 0.0374  |
| (%)                                   |            |            |            |         |
| Excellent                             | 14 (70.0%) | 10 (38.5%) | 24 (52.2%) |         |
| Biochemical incomplete                | 6 (30.0%)  | 14 (53.8%) | 20 (43.5%) |         |
| Structural incomplete                 | 0 (0.0%)   | 2 (7.7%)   | 2 (4.3%)   |         |
| Final follow-up, <i>n</i> (%)         |            |            |            | 0.0053  |
| NED                                   | 14 (70.0%) | 9 (34.6%)  | 23 (50.0%) |         |
| Biochemical incomplete                | 3 (15.0%)  | 14 (53.8%) | 17 (37.0%) |         |
| Structural incomplete                 | 1 (5.0%)   | 1 (3.8%)   | 2 (4.3%)   |         |
| Death MTC-unrelated                   | 0 (0.0%)   | 2 (7.7%)   | 2 (4.3%)   |         |
| Death MTC-related                     | 2 (10.0%)  | 0 (0.0%)   | 2 (4.3%)   |         |
| Additional therapies, <i>n</i> (%)    |            |            |            | 0.0293  |
| No                                    | 18 (90.0%) | 16 (61.5%) | 34 (73.9%) |         |
| Yes                                   | 2 (10.0%)  | 10 (38.5%) | 12 (26.1%) |         |
| Germline <i>RET</i> mutations         |            |            |            | 0.02321 |
| No                                    | 15 (50.0%) | 15 (50.0%) | 30 (65.2%) |         |
| Yes                                   | 5 (31.2%)  | 11 (68.8%) | 16 (34.8%) |         |

IHC, immunohistochemistry; MTC, medullary thyroid cancer; TNM, tumor node metastasis; NED, no evidence of disease.
