# Supplementary material for: CD276 as a Candidate Target for Immunotherapy in Medullary Thyroid Cancer
Source: MDPI journal article supplement (doi:10.3390/ijms241210019), 2023-06-12
Supplement: s1 [file s1]

**Supplementary Table S2. The hierarchization of variables related to final follow-up and initial response to therapy.**

|                                                           |               | Initial response to therapy<br>(less than excellent response) |            |         | Final follow-up<br>(no remission of the disease) |            |         |
|-----------------------------------------------------------|---------------|---------------------------------------------------------------|------------|---------|--------------------------------------------------|------------|---------|
|                                                           |               | n=22                                                          |            |         | n=23                                             |            |         |
|                                                           |               | univariable OR                                                | 95% CI     | p-value | univariable OR                                   | 95% CI     | p-value |
| Gender                                                    | Female        | Ref. level                                                    |            |         | Ref. level                                       |            |         |
|                                                           | Male          | 2.08                                                          | 0.59-7.29  | 0.2538  | 2.77                                             | 0.76-10.05 | 0.1214  |
| Age at diagnosis, years                                   |               | 0.98                                                          | 0.95-1.03  | 0.4627  | 0.98                                             | 0.94-1.02  | 0.2462  |
| Tumor size, mm                                            |               | 1.03                                                          | 0.98-1.07  | 0.2315  | 1.02                                             | 0.98-1.06  | 0.3183  |
| Multifocality                                             | No            | Ref. level                                                    |            |         | Ref. level                                       |            |         |
|                                                           | Yes           | 1.13                                                          | 0.32-3.98  | 0.8452  | 2.31                                             | 0.63-8.47  | 0.2049  |
| Extrathyroidal extension                                  | No            | Ref. level                                                    |            |         | Ref. level                                       |            |         |
|                                                           | Yes           | 2.3                                                           | 0.19-27.3  | 0.5094  | 2.1                                              | 0.18-24.87 | 0.5579  |
| Angioinvasion                                             | No            | Ref. level                                                    |            |         | Ref. level                                       |            |         |
|                                                           | Yes           | 1.74                                                          | 0.26-11.51 | 0.5673  | 1.57                                             | 0.24-10.44 | 0.6378  |
| Central lymph node metastasis                             | No            | Ref. level                                                    |            |         | Ref. level                                       |            |         |
|                                                           | Yes           | 0.7                                                           | 0.11-4.64  | 0.7116  | 1.58                                             | 0.24-10.44 | 0.6378  |
| Lateral lymph node metastasis                             | No            | Ref. level                                                    |            |         | Ref. level                                       |            |         |
|                                                           | Yes           | 7                                                             | 1.61-30.45 | 0.0095  | 11.45                                            | 2.17-60.56 | 0.0041  |
| Preoperative serum calcitonin (CT) levels, pg/ml (groups) | up to 400     | Ref. level                                                    |            |         | Ref. level                                       |            |         |
|                                                           | more than 400 | 1.32                                                          | 0.4-4.38   | 0.65    | 0.76                                             | 0.23-2.51  | 0.65    |
| Germline RET mutations                                    | No            | Ref. level                                                    |            |         | Ref. level                                       |            |         |
|                                                           | Yes           | 2.5                                                           | 0.72-8.71  | 0.1502  | 5.18                                             | 1.34-20.06 | 0.0172  |
