# Supplementary material for: CD276 as a Candidate Target for Immunotherapy in Medullary Thyroid Cancer
Source: MDPI journal article supplement (doi:10.3390/ijms241210019), 2023-06-12
Supplement: s1 [file s1]

**Supplementary Table S3. Comparing sensitivity, specificity, positive and negative predictive values and accuracy for CD276 immunohistochemistry and lateral lymph node metastasis in group with less than excellent response to initial therapy.**

|                           | CD276-<br>positive<br>group with<br>less than<br>excellent<br>response to<br>initial<br>therapy | Group with<br>lateral lymph<br>node<br>metastasis<br>and less than<br>excellent<br>response to<br>initial therapy | p-value |
|---------------------------|-------------------------------------------------------------------------------------------------|-------------------------------------------------------------------------------------------------------------------|---------|
|                           | <i>n</i> =22                                                                                    | <i>n</i> =22                                                                                                      |         |
| Sensitivity               | 72.7%                                                                                           | 50.0%                                                                                                             | 0.0253  |
| Specificity               | 58.3%                                                                                           | 87.5%                                                                                                             | 0.0196  |
| Positive predictive value | 61.5%                                                                                           | 78.6%                                                                                                             | 0.1309  |
| Negative predictive value | 70.0%                                                                                           | 65.6%                                                                                                             | 0.5378  |
| Accuracy                  | 65.2%                                                                                           | 69.6%                                                                                                             | 0.6565  |
